# Supplementary material for: Robust reduced graphene oxide paper fabricated with a household non-stick frying pan: a large-area freestanding flexible substrate for supercapacitors
Source: Royal Society of Chemistry journal article supplement (doi:10.1039/c5ra02868j), 2015-01-01
Supplement: c5ra02868j1.pdf [file c5ra02868j1.pdf]

† Electronic Supplementary Information (ESI) available. See DOI:10.1039/b0000000x/

## Robust Reduced Graphene-Oxide Paper Fabricated by Household Non-stick Frying pan: Large-area Freestanding Flexible Substrate for Supercapacitor†

Yang Huang,<sup>a</sup> Minshen Zhu,<sup>a</sup> Wenjun Meng,<sup>a</sup> Yuqiao Fu,<sup>a</sup> Zifeng Wang,<sup>a</sup> Yan Huang,<sup>a</sup> Zhengxia Pei<sup>a</sup> and Chunyi Zhi<sup>\*ab</sup>

<sup>a</sup>Department of Physics and Materials Science, City University of Hong Kong, 83 Tat Chee Avenue, Kowloon, Hong Kong.

E-mail: [cy.zhi@cityu.edu.hk](mailto:cy.zhi@cityu.edu.hk); Fax: 852-3442-0538; Tel:852-3442-7891

<sup>b</sup>Shenzhen Research Institute, City University of Hong Kong, Shenzhen, P. R. China

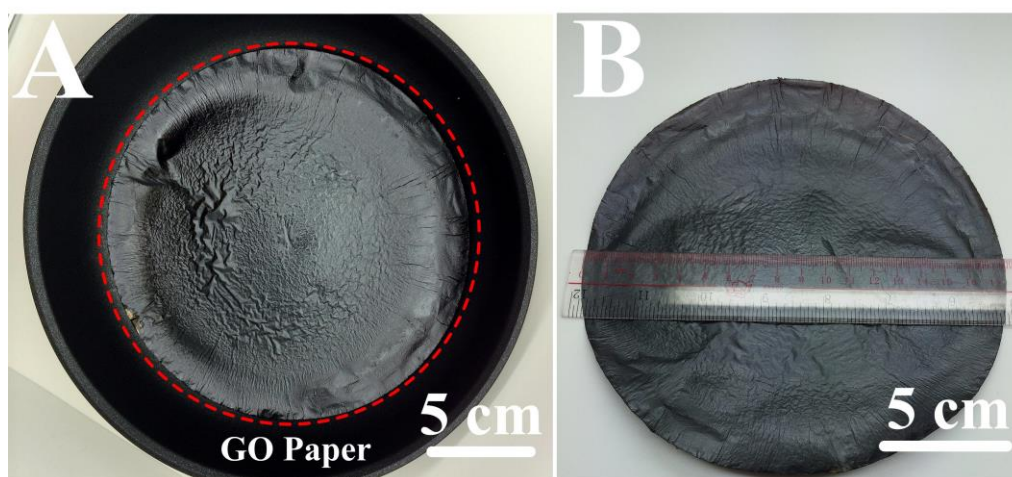

Fig. S1 Photographs of a round-shape GO paper up to 240 cm<sup>2</sup>: (A) in the non-stick frying pan and (B) peeling off from the pan.

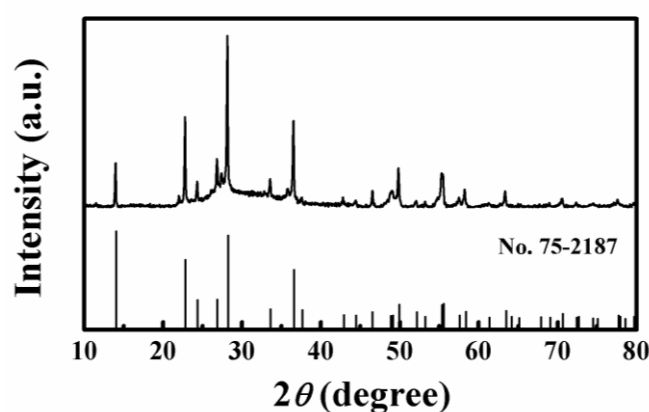

Fig. S2 XRD patterns of residual WO<sub>3</sub> particles.

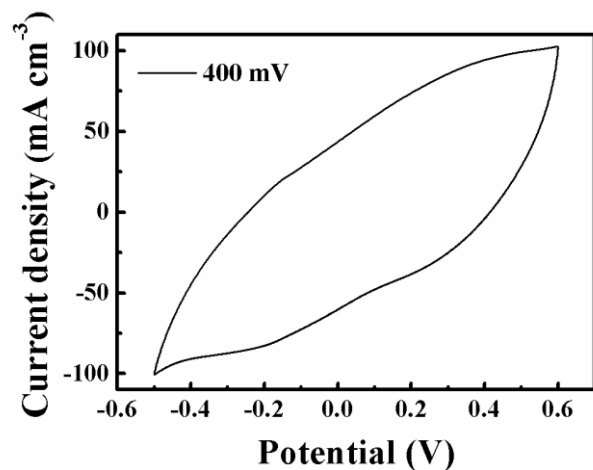

Fig. S3 Cyclic voltammogram (CV) of  $\text{WO}_3\text{-RGO/PPy-RGO}$  at a scan rate of  $400 \text{ mV s}^{-1}$ .

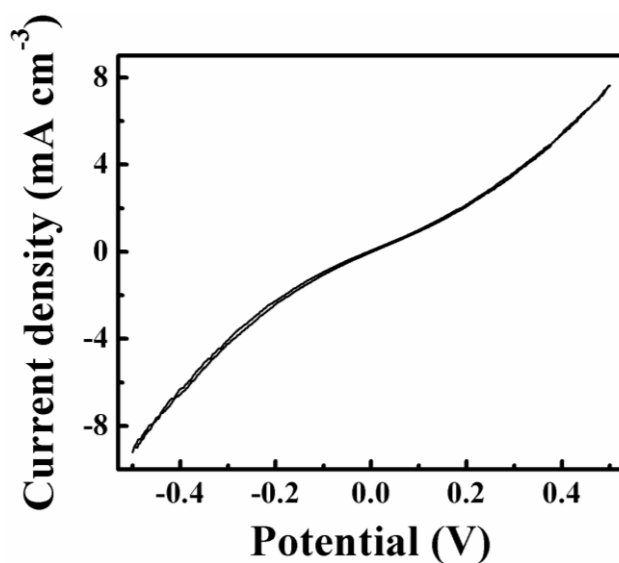

Fig. S4 CV of pure RGO symmetric supercapacitor at a scan rate of  $400 \text{ mV s}^{-1}$ , which exhibit a capacitance close to 0.

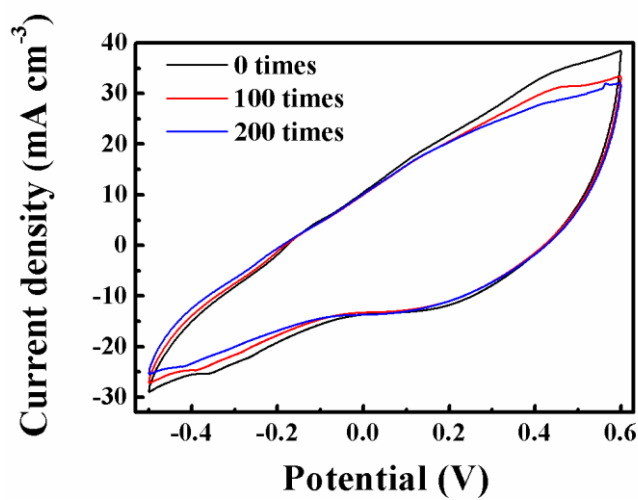

Fig. S5 CVs of  $\text{WO}_3\text{-RGO/PPy-RGO}$  at a scan rate of  $60 \text{ mV s}^{-1}$  with different bending times.
